# Supplementary material
Source: HighWire-hosted journal article supplement (http://www.ajevonline.org/highwire/filestream/1907/field_highwire_adjunct_files/0/7_12-095_642p231_SuppData_revised.pdf)
Supplement: 7_12-095_642p231_SuppData_revised.pdf [file 7_12-095_642p231_SuppData_revised.pdf]

### Supplemental Data for:

Joseph, C.M.L., L.W. Gorton, S.E. Ebeler, and L.F. Bisson. 2013.

Production of volatile compounds by wine strains of *Brettanomyces bruxellensis* grown in the presence of different precursor substrates.

Am. J. Enol. Vitic. 64:231-240. doi: 10.5344/ajev.2013.12095.

**Supplemental Data** Data are the means of three replications of each sample. Chemicals are identified with the commonly used name and the CAS number for clarity. Values are expressed as µg/mL based on the peak area of the internal standard, 2-nonanone, which was set to 1 to reflect the actual concentration of 1 µg/mL. The superscript letters indicate values that varied significantly ( $p < 0.05$ ), based on ANOVA, in supplemented medium when compared to unsupplemented medium (<sup>a</sup> is not significantly different, <sup>b</sup> is significantly different). Bold font also indicates a statistically significant change.

| Strain | Supplement    | Ethyl acetate<br>141-78-6 | Butanol<br>71-36-3        | Acetic acid<br>64-19-7    | 3-Methyl-1-<br>butanol<br>123-51-3 | 2-Methyl-1-<br>butanol<br>137-32-6 | Ethyl<br>isobutyrate<br>97-62-1 | Isobutyric acid<br>79-31-2 | Ethyl-2-methyl<br>butyrate<br>7452-79-1 |
|--------|---------------|---------------------------|---------------------------|---------------------------|------------------------------------|------------------------------------|---------------------------------|----------------------------|-----------------------------------------|
| 615    | None          | 0.0235 <sup>a</sup>       | 0 <sup>a</sup>            | 0.0046 <sup>a</sup>       | 0.0071 <sup>a</sup>                | 0.0069 <sup>a</sup>                | 0 <sup>a</sup>                  | 0 <sup>a</sup>             | 0 <sup>a</sup>                          |
| 2058   | None          | 0.0101 <sup>a</sup>       | 0 <sup>a</sup>            | 0.0371 <sup>a</sup>       | 0.0180 <sup>a</sup>                | 0 <sup>a</sup>                     | 0 <sup>a</sup>                  | 0 <sup>a</sup>             | 0 <sup>a</sup>                          |
| 2077   | None          | 0.0197 <sup>a</sup>       | 0 <sup>a</sup>            | 0 <sup>a</sup>            | 0.0060 <sup>a</sup>                | 0 <sup>a</sup>                     | 0 <sup>a</sup>                  | 0 <sup>a</sup>             | 0 <sup>a</sup>                          |
| 2082   | None          | 0.0237 <sup>a</sup>       | 0 <sup>a</sup>            | 0.0181 <sup>a</sup>       | 0.0079 <sup>a</sup>                | 0 <sup>a</sup>                     | 0 <sup>a</sup>                  | 0 <sup>a</sup>             | 0.0018 <sup>a</sup>                     |
| 2091   | None          | 0.0240 <sup>a</sup>       | 0 <sup>a</sup>            | 0.0162 <sup>a</sup>       | 0.0077 <sup>a</sup>                | 0.0072 <sup>a</sup>                | 0 <sup>a</sup>                  | 0 <sup>a</sup>             | 0 <sup>a</sup>                          |
| 615    | Caffeic acid  | 0.0236 <sup>a</sup>       | 0 <sup>a</sup>            | 0.0080 <sup>a</sup>       | 0.0046 <sup>a</sup>                | 0.0078 <sup>a</sup>                | 0 <sup>a</sup>                  | 0 <sup>a</sup>             | 0 <sup>a</sup>                          |
| 2058   | Caffeic acid  | 0.0185 <sup>a</sup>       | 0 <sup>a</sup>            | 0.0440 <sup>a</sup>       | 0.0255 <sup>a</sup>                | <b>0.0218<sup>b</sup></b>          | 0 <sup>a</sup>                  | 0 <sup>a</sup>             | <b>0.0025<sup>b</sup></b>               |
| 2077   | Caffeic acid  | 0.0249 <sup>a</sup>       | 0 <sup>a</sup>            | <b>0.0155<sup>b</sup></b> | <b>0.0161<sup>b</sup></b>          | 0 <sup>a</sup>                     | 0 <sup>a</sup>                  | 0 <sup>a</sup>             | 0 <sup>a</sup>                          |
| 2082   | Caffeic acid  | 0.0258 <sup>a</sup>       | 0 <sup>a</sup>            | 0.0172 <sup>a</sup>       | <b>0.0034<sup>b</sup></b>          | <b>0.0026<sup>b</sup></b>          | 0 <sup>a</sup>                  | 0 <sup>a</sup>             | <b>0.0041<sup>b</sup></b>               |
| 2091   | Caffeic acid  | 0.0337 <sup>a</sup>       | 0 <sup>a</sup>            | 0.0209 <sup>a</sup>       | 0.0084 <sup>a</sup>                | 0.0067 <sup>a</sup>                | 0 <sup>a</sup>                  | 0 <sup>a</sup>             | 0 <sup>a</sup>                          |
| 615    | Coumaric acid | 0.0356 <sup>a</sup>       | 0 <sup>a</sup>            | <b>0.0134<sup>b</sup></b> | 0.0042 <sup>a</sup>                | 0.0057 <sup>a</sup>                | 0 <sup>a</sup>                  | 0 <sup>a</sup>             | 0 <sup>a</sup>                          |
| 2058   | Coumaric acid | 0.0148 <sup>a</sup>       | 0 <sup>a</sup>            | 0.0238 <sup>a</sup>       | 0.0126 <sup>a</sup>                | <b>0.0065<sup>b</sup></b>          | 0 <sup>a</sup>                  | 0 <sup>a</sup>             | 0 <sup>a</sup>                          |
| 2077   | Coumaric acid | 0.0375 <sup>a</sup>       | 0 <sup>a</sup>            | <b>0.0167<sup>b</sup></b> | 0.0128 <sup>a</sup>                | 0 <sup>a</sup>                     | 0 <sup>a</sup>                  | 0 <sup>a</sup>             | 0 <sup>a</sup>                          |
| 2082   | Coumaric acid | 0.0291 <sup>a</sup>       | 0 <sup>a</sup>            | 0.0165 <sup>a</sup>       | <b>0.0030<sup>b</sup></b>          | <b>0.0036<sup>b</sup></b>          | 0 <sup>a</sup>                  | 0 <sup>a</sup>             | <b>0.0046<sup>b</sup></b>               |
| 2091   | Coumaric acid | 0.0289 <sup>a</sup>       | 0 <sup>a</sup>            | 0.0143 <sup>a</sup>       | 0.0066 <sup>a</sup>                | <b>0<sup>b</sup></b>               | 0 <sup>a</sup>                  | 0 <sup>a</sup>             | 0 <sup>a</sup>                          |
| 615    | Ferulic acid  | 0.0200 <sup>a</sup>       | 0 <sup>a</sup>            | 0.0067 <sup>a</sup>       | <b>0.0032<sup>b</sup></b>          | 0.0058 <sup>a</sup>                | 0 <sup>a</sup>                  | 0 <sup>a</sup>             | 0 <sup>a</sup>                          |
| 2058   | Ferulic acid  | <b>0.0239<sup>b</sup></b> | 0 <sup>a</sup>            | 0.0316 <sup>a</sup>       | 0.0182 <sup>a</sup>                | <b>0.0098<sup>b</sup></b>          | 0 <sup>a</sup>                  | 0 <sup>a</sup>             | 0 <sup>a</sup>                          |
| 2077   | Ferulic acid  | 0.0266 <sup>a</sup>       | 0 <sup>a</sup>            | <b>0.0154<sup>b</sup></b> | 0.0109                             | <b>0.0056<sup>b</sup></b>          | 0 <sup>a</sup>                  | 0 <sup>a</sup>             | 0 <sup>a</sup>                          |
| 2082   | Ferulic acid  | 0.0134 <sup>a</sup>       | 0 <sup>a</sup>            | 0.0215 <sup>a</sup>       | 0.0067 <sup>a</sup>                | 0 <sup>a</sup>                     | 0 <sup>a</sup>                  | 0 <sup>a</sup>             | 0.0022 <sup>a</sup>                     |
| 2091   | Ferulic acid  | 0.0267 <sup>a</sup>       | 0 <sup>a</sup>            | 0.0144 <sup>a</sup>       | 0.0057 <sup>a</sup>                | 0.0049 <sup>a</sup>                | 0 <sup>a</sup>                  | 0 <sup>a</sup>             | 0 <sup>a</sup>                          |
| 615    | Phenylalanine | 0.0330 <sup>a</sup>       | 0 <sup>a</sup>            | 0.0091 <sup>a</sup>       | 0.0123 <sup>a</sup>                | 0.0126 <sup>a</sup>                | 0 <sup>a</sup>                  | 0 <sup>a</sup>             | 0 <sup>a</sup>                          |
| 2058   | Phenylalanine | <b>0.0259<sup>b</sup></b> | 0 <sup>a</sup>            | 0.0246 <sup>a</sup>       | <b>0.0399<sup>b</sup></b>          | <b>0.0299<sup>b</sup></b>          | 0 <sup>a</sup>                  | 0 <sup>a</sup>             | 0 <sup>a</sup>                          |
| 2077   | Phenylalanine | 0.0268 <sup>a</sup>       | 0 <sup>a</sup>            | <b>0.0089<sup>b</sup></b> | <b>0.0283<sup>b</sup></b>          | <b>0.0056<sup>b</sup></b>          | 0 <sup>a</sup>                  | 0 <sup>a</sup>             | 0 <sup>a</sup>                          |
| 2082   | Phenylalanine | 0.0329 <sup>a</sup>       | 0 <sup>a</sup>            | 0.0112 <sup>a</sup>       | 0.0105 <sup>a</sup>                | <b>0.0111<sup>b</sup></b>          | 0 <sup>a</sup>                  | 0 <sup>a</sup>             | <b>0.0074<sup>b</sup></b>               |
| 2091   | Phenylalanine | 0.0237 <sup>a</sup>       | 0 <sup>a</sup>            | 0.0135 <sup>a</sup>       | <b>0.0288<sup>b</sup></b>          | <b>0.0278<sup>b</sup></b>          | <b>0.0015<sup>b</sup></b>       | 0 <sup>a</sup>             | <b>0.0016<sup>b</sup></b>               |
| 615    | Tryptophan    | 0.0207 <sup>a</sup>       | 0 <sup>a</sup>            | <b>0.0116<sup>b</sup></b> | 0.0069 <sup>a</sup>                | 0.0100 <sup>a</sup>                | 0 <sup>a</sup>                  | 0 <sup>a</sup>             | 0 <sup>a</sup>                          |
| 2058   | Tryptophan    | <b>0.0258<sup>b</sup></b> | 0 <sup>a</sup>            | 0.0277 <sup>a</sup>       | 0.0333 <sup>a</sup>                | <b>0.0186<sup>b</sup></b>          | 0 <sup>a</sup>                  | 0 <sup>a</sup>             | 0 <sup>a</sup>                          |
| 2077   | Tryptophan    | 0.0305 <sup>a</sup>       | 0 <sup>a</sup>            | <b>0.0109<sup>b</sup></b> | <b>0.0249<sup>b</sup></b>          | <b>0.0071<sup>b</sup></b>          | 0 <sup>a</sup>                  | 0 <sup>a</sup>             | 0 <sup>a</sup>                          |
| 2082   | Tryptophan    | 0.0237 <sup>a</sup>       | 0 <sup>a</sup>            | 0.0160 <sup>a</sup>       | <b>0.0035<sup>b</sup></b>          | <b>0.0037<sup>b</sup></b>          | 0 <sup>a</sup>                  | 0 <sup>a</sup>             | <b>0.0073<sup>b</sup></b>               |
| 2091   | Tryptophan    | 0.0254 <sup>a</sup>       | 0 <sup>a</sup>            | 0.0133 <sup>a</sup>       | 0.0082 <sup>a</sup>                | 0.0085 <sup>a</sup>                | 0 <sup>a</sup>                  | 0 <sup>a</sup>             | <b>0.0003<sup>b</sup></b>               |
| 615    | Tyrosine      | 0.0367 <sup>a</sup>       | <b>0.0127<sup>b</sup></b> | <b>0<sup>b</sup></b>      | <b>0.0311<sup>b</sup></b>          | <b>0.0549<sup>b</sup></b>          | <b>0.0055<sup>b</sup></b>       | 0 <sup>a</sup>             | <b>0.0071<sup>b</sup></b>               |
| 2058   | Tyrosine      | <b>0.0286<sup>b</sup></b> | 0 <sup>a</sup>            | 0.0279 <sup>a</sup>       | <b>0.0620<sup>b</sup></b>          | <b>0.0357<sup>b</sup></b>          | <b>0.0016<sup>b</sup></b>       | 0 <sup>a</sup>             | <b>0.004<sup>b</sup></b>                |
| 2077   | Tyrosine      | 0.0391 <sup>a</sup>       | 0 <sup>a</sup>            | <b>0.0078<sup>b</sup></b> | <b>0.0221<sup>b</sup></b>          | <b>0.0073<sup>b</sup></b>          | 0 <sup>a</sup>                  | 0 <sup>a</sup>             | 0 <sup>a</sup>                          |
| 2082   | Tyrosine      | 0.0455 <sup>a</sup>       | 0 <sup>a</sup>            | 0.0156 <sup>a</sup>       | <b>0.0221<sup>b</sup></b>          | <b>0.0364<sup>b</sup></b>          | <b>0.0064<sup>b</sup></b>       | 0 <sup>a</sup>             | <b>0.0139<sup>b</sup></b>               |
| 2091   | Tyrosine      | 0.0388 <sup>a</sup>       | <b>0.0024<sup>b</sup></b> | 0.0181 <sup>a</sup>       | <b>0.0276<sup>b</sup></b>          | <b>0.0489<sup>b</sup></b>          | <b>0.0078<sup>b</sup></b>       | <b>0.0385<sup>b</sup></b>  | <b>0.0075<sup>b</sup></b>               |

**Supplemental Data for:**

Joseph, C.M.L., L.W. Gorton, S.E. Ebeler, and L.F. Bisson. 2013.

Production of volatile compounds by wine strains of *Brettanomyces bruxellensis* grown in the presence of different precursor substrates.

Am. J. Enol. Vitic. 64:231-240. doi: 10.5344/ajev.2013.12095.

| Strain | Supplement    | Pentanoic acid<br>109-52-4 | 3-Methylbutanoic acid<br>503-74-2 | 2-Methylbutanoic acid<br>116-53-0 | 2-Ethyl-1-hexanol<br>104-76-7 | Phenylacetaldehyde<br>122-78-1 | 1-Octanol<br>111-87-5     | 2-Nonanone<br>821-55-6 | Phenethyl alcohol<br>60-12-8 |
|--------|---------------|----------------------------|-----------------------------------|-----------------------------------|-------------------------------|--------------------------------|---------------------------|------------------------|------------------------------|
| 615    | None          | 0 <sup>a</sup>             | 0 <sup>a</sup>                    | 0 <sup>a</sup>                    | 0.0052 <sup>a</sup>           | 0 <sup>a</sup>                 | 0 <sup>a</sup>            | 1 <sup>a</sup>         | 0 <sup>a</sup>               |
| 2058   | None          | 0 <sup>a</sup>             | 0.0077 <sup>a</sup>               | 0.0250 <sup>a</sup>               | 0.0023 <sup>a</sup>           | 0 <sup>a</sup>                 | 0.0025 <sup>a</sup>       | 1 <sup>a</sup>         | 0.2337 <sup>a</sup>          |
| 2077   | None          | 0 <sup>a</sup>             | 0.0115 <sup>a</sup>               | 0.0025 <sup>a</sup>               | 0.0003 <sup>a</sup>           | 0 <sup>a</sup>                 | 0 <sup>a</sup>            | 1 <sup>a</sup>         | 0.0101 <sup>a</sup>          |
| 2082   | None          | 0 <sup>a</sup>             | 0.0043 <sup>a</sup>               | 0.0164 <sup>a</sup>               | 0 <sup>a</sup>                | 0 <sup>a</sup>                 | 0 <sup>a</sup>            | 1 <sup>a</sup>         | 0.0132 <sup>a</sup>          |
| 2091   | None          | 0 <sup>a</sup>             | 0.0165 <sup>a</sup>               | 0.0365 <sup>a</sup>               | 0.0034 <sup>a</sup>           | 0 <sup>a</sup>                 | 0 <sup>a</sup>            | 1 <sup>a</sup>         | 0.0484 <sup>a</sup>          |
| 615    | Caffeic acid  | 0 <sup>a</sup>             | 0 <sup>a</sup>                    | 0 <sup>a</sup>                    | 0.0069 <sup>a</sup>           | 0 <sup>a</sup>                 | 0 <sup>a</sup>            | 1 <sup>a</sup>         | <b>0.0124<sup>b</sup></b>    |
| 2058   | Caffeic acid  | 0 <sup>a</sup>             | 0.0152 <sup>a</sup>               | 0.0335 <sup>a</sup>               | 0.0058 <sup>a</sup>           | 0 <sup>a</sup>                 | 0.0034 <sup>a</sup>       | 1 <sup>a</sup>         | 0.2460 <sup>a</sup>          |
| 2077   | Caffeic acid  | 0 <sup>a</sup>             | 0.0116 <sup>a</sup>               | 0 <sup>a</sup>                    | 0.0040 <sup>a</sup>           | 0 <sup>a</sup>                 | 0 <sup>a</sup>            | 1 <sup>a</sup>         | <b>0.0216<sup>b</sup></b>    |
| 2082   | Caffeic acid  | 0 <sup>a</sup>             | 0.0077 <sup>a</sup>               | 0.0124 <sup>a</sup>               | <b>0.0026<sup>b</sup></b>     | 0 <sup>a</sup>                 | 0 <sup>a</sup>            | 1 <sup>a</sup>         | 0.0101 <sup>a</sup>          |
| 2091   | Caffeic acid  | <b>0.0034<sup>b</sup></b>  | 0.0160 <sup>a</sup>               | 0.0329 <sup>a</sup>               | 0.0039 <sup>a</sup>           | 0 <sup>a</sup>                 | 0 <sup>a</sup>            | 1 <sup>a</sup>         | 0.0428 <sup>a</sup>          |
| 615    | Coumaric acid | 0 <sup>a</sup>             | <b>0.0074<sup>b</sup></b>         | 0 <sup>a</sup>                    | 0.0004 <sup>a</sup>           | 0 <sup>a</sup>                 | 0 <sup>a</sup>            | 1 <sup>a</sup>         | <b>0.0338<sup>b</sup></b>    |
| 2058   | Coumaric acid | 0 <sup>a</sup>             | <b>0.0173<sup>b</sup></b>         | 0.0113 <sup>a</sup>               | 0.0032 <sup>a</sup>           | 0 <sup>a</sup>                 | <b>0<sup>b</sup></b>      | 1 <sup>a</sup>         | 0.3018 <sup>a</sup>          |
| 2077   | Coumaric acid | 0 <sup>a</sup>             | 0.0172 <sup>a</sup>               | 0.0051 <sup>a</sup>               | 0.0051 <sup>a</sup>           | 0 <sup>a</sup>                 | 0 <sup>a</sup>            | 1 <sup>a</sup>         | <b>0.0347<sup>b</sup></b>    |
| 2082   | Coumaric acid | <b>0.0117<sup>b</sup></b>  | <b>0<sup>b</sup></b>              | 0.0146 <sup>a</sup>               | <b>0.0053<sup>b</sup></b>     | 0 <sup>a</sup>                 | 0 <sup>a</sup>            | 1 <sup>a</sup>         | 0.0293 <sup>a</sup>          |
| 2091   | Coumaric acid | 0 <sup>a</sup>             | 0.0210 <sup>a</sup>               | 0.0058 <sup>a</sup>               | 0.0058 <sup>a</sup>           | 0 <sup>a</sup>                 | 0 <sup>a</sup>            | 1 <sup>a</sup>         | 0.0896 <sup>a</sup>          |
| 615    | Ferulic acid  | 0 <sup>a</sup>             | <b>0.0050<sup>b</sup></b>         | 0 <sup>a</sup>                    | 0.0033 <sup>a</sup>           | 0 <sup>a</sup>                 | 0 <sup>a</sup>            | 1 <sup>a</sup>         | <b>0.0200<sup>b</sup></b>    |
| 2058   | Ferulic acid  | 0 <sup>a</sup>             | 0.0038 <sup>a</sup>               | <b>0<sup>b</sup></b>              | 0.0030 <sup>a</sup>           | 0 <sup>a</sup>                 | <b>0<sup>b</sup></b>      | 1 <sup>a</sup>         | 0.1750 <sup>a</sup>          |
| 2077   | Ferulic acid  | 0 <sup>a</sup>             | 0.0103 <sup>a</sup>               | <b>0<sup>b</sup></b>              | 0.0040 <sup>a</sup>           | 0 <sup>a</sup>                 | 0 <sup>a</sup>            | 1 <sup>a</sup>         | <b>0.0222<sup>b</sup></b>    |
| 2082   | Ferulic acid  | 0 <sup>a</sup>             | 0.0080 <sup>a</sup>               | 0.0098 <sup>a</sup>               | <b>0.0031<sup>b</sup></b>     | 0 <sup>a</sup>                 | 0 <sup>a</sup>            | 1 <sup>a</sup>         | 0.0122 <sup>a</sup>          |
| 2091   | Ferulic acid  | 0 <sup>a</sup>             | 0.0109 <sup>a</sup>               | <b>0.0136<sup>b</sup></b>         | 0.0035 <sup>a</sup>           | 0 <sup>a</sup>                 | 0 <sup>a</sup>            | 1 <sup>a</sup>         | 0.0493 <sup>a</sup>          |
| 615    | Phenylalanine | 0 <sup>a</sup>             | <b>0.0109<sup>b</sup></b>         | <b>0.0331<sup>b</sup></b>         | 0.0065 <sup>a</sup>           | 0 <sup>a</sup>                 | 0 <sup>a</sup>            | 1 <sup>a</sup>         | <b>0.6903<sup>b</sup></b>    |
| 2058   | Phenylalanine | 0 <sup>a</sup>             | 0.0113 <sup>a</sup>               | 0.0202 <sup>a</sup>               | 0.0028 <sup>a</sup>           | <b>0.0027<sup>b</sup></b>      | <b>0<sup>b</sup></b>      | 1 <sup>a</sup>         | <b>1.2754<sup>b</sup></b>    |
| 2077   | Phenylalanine | 0 <sup>a</sup>             | 0.0175 <sup>a</sup>               | 0.0048 <sup>a</sup>               | <b>0.0053<sup>b</sup></b>     | 0 <sup>a</sup>                 | 0 <sup>a</sup>            | 1 <sup>a</sup>         | <b>0.5466<sup>b</sup></b>    |
| 2082   | Phenylalanine | 0 <sup>a</sup>             | <b>0.0327<sup>b</sup></b>         | <b>0.0500<sup>b</sup></b>         | <b>0.0060<sup>b</sup></b>     | 0 <sup>a</sup>                 | 0 <sup>a</sup>            | 1 <sup>a</sup>         | <b>0.4402<sup>b</sup></b>    |
| 2091   | Phenylalanine | 0 <sup>a</sup>             | 0.0300 <sup>a</sup>               | <b>0.0822<sup>b</sup></b>         | 0.0060 <sup>a</sup>           | 0 <sup>a</sup>                 | 0 <sup>a</sup>            | 1 <sup>a</sup>         | <b>0.6127<sup>b</sup></b>    |
| 615    | Tryptophan    | 0 <sup>a</sup>             | <b>0.0110<sup>b</sup></b>         | <b>0.0100<sup>b</sup></b>         | 0.0028 <sup>a</sup>           | 0 <sup>a</sup>                 | 0 <sup>a</sup>            | 1 <sup>a</sup>         | <b>0.0822<sup>b</sup></b>    |
| 2058   | Tryptophan    | 0 <sup>a</sup>             | <b>0.0161<sup>b</sup></b>         | 0.0195 <sup>a</sup>               | 0.0029 <sup>a</sup>           | <b>0.0021<sup>b</sup></b>      | 0.0026 <sup>a</sup>       | 1 <sup>a</sup>         | 0.3322 <sup>a</sup>          |
| 2077   | Tryptophan    | 0 <sup>a</sup>             | <b>0.0331<sup>b</sup></b>         | 0.0060 <sup>a</sup>               | 0.0039 <sup>a</sup>           | 0 <sup>a</sup>                 | 0 <sup>a</sup>            | 1 <sup>a</sup>         | <b>0.0973<sup>b</sup></b>    |
| 2082   | Tryptophan    | 0 <sup>a</sup>             | <b>0.0278<sup>b</sup></b>         | <b>0.0405<sup>b</sup></b>         | <b>0.0023<sup>b</sup></b>     | 0 <sup>a</sup>                 | 0 <sup>a</sup>            | 1 <sup>a</sup>         | 0.0239 <sup>a</sup>          |
| 2091   | Tryptophan    | 0 <sup>a</sup>             | <b>0.0415<sup>b</sup></b>         | <b>0.0889<sup>b</sup></b>         | 0.0039 <sup>a</sup>           | 0 <sup>a</sup>                 | 0 <sup>a</sup>            | 1 <sup>a</sup>         | <b>0.1368<sup>b</sup></b>    |
| 615    | Tyrosine      | 0 <sup>a</sup>             | <b>0.0691<sup>b</sup></b>         | <b>0.1099<sup>b</sup></b>         | 0.0130 <sup>a</sup>           | 0 <sup>a</sup>                 | <b>0.0033<sup>b</sup></b> | 1 <sup>a</sup>         | <b>0.1234<sup>b</sup></b>    |
| 2058   | Tyrosine      | 0 <sup>a</sup>             | <b>0.0672<sup>b</sup></b>         | <b>0.0737<sup>b</sup></b>         | <b>0.0083<sup>b</sup></b>     | <b>0.0029<sup>b</sup></b>      | 0.0048 <sup>a</sup>       | 1 <sup>a</sup>         | <b>0.6667<sup>b</sup></b>    |
| 2077   | Tyrosine      | 0 <sup>a</sup>             | 0.0230 <sup>a</sup>               | <b>0.0070<sup>b</sup></b>         | <b>0.0047<sup>b</sup></b>     | 0 <sup>a</sup>                 | 0 <sup>a</sup>            | 1 <sup>a</sup>         | <b>0.0277<sup>b</sup></b>    |
| 2082   | Tyrosine      | 0 <sup>a</sup>             | <b>0.0545<sup>b</sup></b>         | <b>0.1550<sup>b</sup></b>         | <b>0.0068<sup>b</sup></b>     | 0 <sup>a</sup>                 | 0 <sup>a</sup>            | 1 <sup>a</sup>         | <b>0.1168<sup>b</sup></b>    |
| 2091   | Tyrosine      | 0 <sup>a</sup>             | <b>0.1011<sup>b</sup></b>         | <b>0.2448<sup>b</sup></b>         | 0.0054 <sup>a</sup>           | 0 <sup>a</sup>                 | 0 <sup>a</sup>            | 1 <sup>a</sup>         | <b>0.1491<sup>b</sup></b>    |

**Supplemental Data for:**

Joseph, C.M.L., L.W. Gorton, S.E. Ebeler, and L.F. Bisson. 2013.

Production of volatile compounds by wine strains of *Brettanomyces bruxellensis* grown in the presence of different precursor substrates.

Am. J. Enol. Vitic. 64:231-240. doi: 10.5344/ajev.2013.12095.

| Strain | Supplement    | Octanoic acid<br>124-07-2 | 4-Ethylphenol<br>123-07-9 | Ethyl octanoate<br>106-32-1 | Phenethyl propionate<br>103-52-6 | Phenethyl acetate<br>103-45-7 | 1-Decanol<br>112-30-1     | 4-Ethylguaiacol<br>2785-89-9I |
|--------|---------------|---------------------------|---------------------------|-----------------------------|----------------------------------|-------------------------------|---------------------------|-------------------------------|
| 615    | None          | 0.0677 <sup>a</sup>       | 0 <sup>a</sup>            | 0.1139 <sup>a</sup>         | 0 <sup>a</sup>                   | 0 <sup>a</sup>                | 0.0052 <sup>a</sup>       | 0 <sup>a</sup>                |
| 2058   | None          | 0.0432 <sup>a</sup>       | 0 <sup>a</sup>            | 0.0860 <sup>a</sup>         | 0.0024 <sup>a</sup>              | 0 <sup>a</sup>                | 0 <sup>a</sup>            | 0 <sup>a</sup>                |
| 2077   | None          | 0.0427 <sup>a</sup>       | 0 <sup>a</sup>            | 0.0653 <sup>a</sup>         | 0 <sup>a</sup>                   | 0 <sup>a</sup>                | 0.0041 <sup>a</sup>       | 0 <sup>a</sup>                |
| 2082   | None          | 0.0293 <sup>a</sup>       | 0 <sup>a</sup>            | 0.1399 <sup>a</sup>         | 0 <sup>a</sup>                   | 0 <sup>a</sup>                | 0 <sup>a</sup>            | 0 <sup>a</sup>                |
| 2091   | None          | 0.0195 <sup>a</sup>       | 0 <sup>a</sup>            | 0.0301 <sup>a</sup>         | 0 <sup>a</sup>                   | 0 <sup>a</sup>                | 0 <sup>a</sup>            | 0 <sup>a</sup>                |
| 615    | Caffeic acid  | 0.0419 <sup>a</sup>       | 0 <sup>a</sup>            | 0.2057 <sup>a</sup>         | 0 <sup>a</sup>                   | 0 <sup>a</sup>                | 0.0036 <sup>a</sup>       | <b>0.0118<sup>b</sup></b>     |
| 2058   | Caffeic acid  | 0.0685 <sup>a</sup>       | 0 <sup>a</sup>            | 0.1691 <sup>a</sup>         | 0.0041 <sup>a</sup>              | 0 <sup>a</sup>                | <b>0.0040<sup>b</sup></b> | <b>0.0207<sup>b</sup></b>     |
| 2077   | Caffeic acid  | 0.0410 <sup>a</sup>       | 0 <sup>a</sup>            | 0.0661 <sup>a</sup>         | 0 <sup>a</sup>                   | 0 <sup>a</sup>                | 0.0054 <sup>a</sup>       | <b>0.0164<sup>b</sup></b>     |
| 2082   | Caffeic acid  | 0.0218 <sup>a</sup>       | 0 <sup>a</sup>            | 0.1597 <sup>a</sup>         | 0 <sup>a</sup>                   | 0 <sup>a</sup>                | 0 <sup>a</sup>            | <b>0.0111<sup>b</sup></b>     |
| 2091   | Caffeic acid  | 0.0205 <sup>a</sup>       | 0 <sup>a</sup>            | 0.0596 <sup>a</sup>         | 0 <sup>a</sup>                   | 0 <sup>a</sup>                | 0 <sup>a</sup>            | <b>0.0138<sup>b</sup></b>     |
| 615    | Coumaric acid | <b>0<sup>b</sup></b>      | <b>3.1503<sup>b</sup></b> | 0.1980 <sup>a</sup>         | 0 <sup>a</sup>                   | 0 <sup>a</sup>                | 0.0028 <sup>a</sup>       | 0 <sup>a</sup>                |
| 2058   | Coumaric acid | 0.0793 <sup>a</sup>       | <b>2.8766<sup>b</sup></b> | 0.1646 <sup>a</sup>         | <b>0<sup>b</sup></b>             | <b>0.0045<sup>b</sup></b>     | <b>0.0028<sup>b</sup></b> | 0 <sup>a</sup>                |
| 2077   | Coumaric acid | <b>0.1011<sup>b</sup></b> | <b>3.0865<sup>b</sup></b> | 0.0909 <sup>a</sup>         | 0 <sup>a</sup>                   | 0 <sup>a</sup>                | 0.0089 <sup>a</sup>       | 0 <sup>a</sup>                |
| 2082   | Coumaric acid | <b>0.0745<sup>b</sup></b> | <b>3.0882<sup>b</sup></b> | 0.2370 <sup>a</sup>         | 0 <sup>a</sup>                   | 0 <sup>a</sup>                | 0 <sup>a</sup>            | 0 <sup>a</sup>                |
| 2091   | Coumaric acid | <b>0.0750<sup>b</sup></b> | <b>3.2907<sup>b</sup></b> | <b>0<sup>b</sup></b>        | 0 <sup>a</sup>                   | 0 <sup>a</sup>                | <b>0.0032<sup>b</sup></b> | 0 <sup>a</sup>                |
| 615    | Ferulic acid  | 0.0589 <sup>a</sup>       | 0 <sup>a</sup>            | 0.1728 <sup>a</sup>         | 0 <sup>a</sup>                   | 0 <sup>a</sup>                | 0.0045 <sup>a</sup>       | <b>5.0503<sup>b</sup></b>     |
| 2058   | Ferulic acid  | 0.0435 <sup>a</sup>       | 0 <sup>a</sup>            | 0.1159 <sup>a</sup>         | <b>0<sup>b</sup></b>             | <b>0.0025<sup>b</sup></b>     | <b>0.0029<sup>b</sup></b> | <b>4.2126<sup>b</sup></b>     |
| 2077   | Ferulic acid  | 0.0372 <sup>a</sup>       | 0 <sup>a</sup>            | 0.0817 <sup>a</sup>         | 0 <sup>a</sup>                   | 0 <sup>a</sup>                | 0.0067 <sup>a</sup>       | <b>4.4811<sup>b</sup></b>     |
| 2082   | Ferulic acid  | 0.0299 <sup>a</sup>       | 0 <sup>a</sup>            | 0.1441 <sup>a</sup>         | 0 <sup>a</sup>                   | 0 <sup>a</sup>                | <b>0.0013<sup>b</sup></b> | <b>4.2989<sup>b</sup></b>     |
| 2091   | Ferulic acid  | 0.0166 <sup>a</sup>       | 0 <sup>a</sup>            | 0.0319 <sup>a</sup>         | 0 <sup>a</sup>                   | 0 <sup>a</sup>                | <b>0.0021<sup>b</sup></b> | <b>4.2980<sup>b</sup></b>     |
| 615    | Phenylalanine | 0.0395 <sup>a</sup>       | 0 <sup>a</sup>            | 0.1398 <sup>a</sup>         | 0 <sup>a</sup>                   | <b>0.0440<sup>b</sup></b>     | 0.0042 <sup>a</sup>       | 0 <sup>a</sup>                |
| 2058   | Phenylalanine | 0.0239 <sup>a</sup>       | 0 <sup>a</sup>            | 0.0754 <sup>a</sup>         | <b>0<sup>b</sup></b>             | <b>0.0401<sup>b</sup></b>     | 0 <sup>a</sup>            | 0 <sup>a</sup>                |
| 2077   | Phenylalanine | 0.0370 <sup>a</sup>       | 0 <sup>a</sup>            | 0.057 <sup>a</sup>          | 0 <sup>a</sup>                   | <b>0.0290<sup>b</sup></b>     | 0.0054 <sup>a</sup>       | 0 <sup>a</sup>                |
| 2082   | Phenylalanine | 0.0287 <sup>a</sup>       | 0 <sup>a</sup>            | 0.1287 <sup>a</sup>         | 0 <sup>a</sup>                   | <b>0.0724<sup>b</sup></b>     | 0 <sup>a</sup>            | 0 <sup>a</sup>                |
| 2091   | Phenylalanine | <b>0<sup>b</sup></b>      | 0 <sup>a</sup>            | 0.0299 <sup>a</sup>         | 0 <sup>a</sup>                   | <b>0.0041<sup>b</sup></b>     | 0 <sup>a</sup>            | 0 <sup>a</sup>                |
| 615    | Tryptophan    | 0.0518 <sup>a</sup>       | 0 <sup>a</sup>            | <b>0.1943<sup>b</sup></b>   | 0 <sup>a</sup>                   | 0 <sup>a</sup>                | <b>0<sup>b</sup></b>      | 0 <sup>a</sup>                |
| 2058   | Tryptophan    | 0.0434 <sup>a</sup>       | 0 <sup>a</sup>            | <b>0.1133<sup>b</sup></b>   | 0.0038 <sup>a</sup>              | 0 <sup>a</sup>                | 0 <sup>a</sup>            | 0 <sup>a</sup>                |
| 2077   | Tryptophan    | 0.0327 <sup>a</sup>       | 0 <sup>a</sup>            | <b>0.0810<sup>b</sup></b>   | 0 <sup>a</sup>                   | 0 <sup>a</sup>                | 0.0052 <sup>a</sup>       | 0 <sup>a</sup>                |
| 2082   | Tryptophan    | 0.0358 <sup>a</sup>       | 0 <sup>a</sup>            | 0.1377 <sup>a</sup>         | 0 <sup>a</sup>                   | <b>0.0091<sup>b</sup></b>     | 0 <sup>a</sup>            | 0 <sup>a</sup>                |
| 2091   | Tryptophan    | 0.0109 <sup>a</sup>       | 0 <sup>a</sup>            | 0.0341 <sup>a</sup>         | 0 <sup>a</sup>                   | <b>0.0113<sup>b</sup></b>     | 0 <sup>a</sup>            | 0 <sup>a</sup>                |
| 615    | Tyrosine      | 0.0649 <sup>a</sup>       | 0 <sup>a</sup>            | 0.2144 <sup>a</sup>         | 0 <sup>a</sup>                   | <b>0.0098<sup>b</sup></b>     | <b>0<sup>b</sup></b>      | 0 <sup>a</sup>                |
| 2058   | Tyrosine      | 0.0290 <sup>a</sup>       | 0 <sup>a</sup>            | 0.0690 <sup>a</sup>         | <b>0<sup>b</sup></b>             | <b>0.0336<sup>b</sup></b>     | <b>0.0049<sup>b</sup></b> | 0 <sup>a</sup>                |
| 2077   | Tyrosine      | 0.0391 <sup>a</sup>       | 0 <sup>a</sup>            | 0.0507 <sup>a</sup>         | 0 <sup>a</sup>                   | <b>0.0052<sup>b</sup></b>     | 0.0059 <sup>a</sup>       | 0 <sup>a</sup>                |
| 2082   | Tyrosine      | <b>0.0700<sup>b</sup></b> | 0 <sup>a</sup>            | 0.2510 <sup>a</sup>         | 0 <sup>a</sup>                   | 0 <sup>a</sup>                | <b>0.0026<sup>b</sup></b> | 0 <sup>a</sup>                |
| 2091   | Tyrosine      | 0.0129 <sup>a</sup>       | 0 <sup>a</sup>            | 0.0580 <sup>a</sup>         | 0 <sup>a</sup>                   | <b>0.0091<sup>b</sup></b>     | <b>0.0023<sup>b</sup></b> | 0 <sup>a</sup>                |

**Supplemental Data for:**

Joseph, C.M.L., L.W. Gorton, S.E. Ebeler, and L.F. Bisson. 2013.

Production of volatile compounds by wine strains of *Brettanomyces bruxellensis* grown in the presence of different precursor substrates.

Am. J. Enol. Vitic. 64:231-240. doi: 10.5344/ajev.2013.12095.

| Strain | Supplement    | Decanoic acid<br>334-48-5 | Ethyl decanoate<br>101-38-3 | $\beta$ -Farnesene<br>18794-84-8 | Ethyl octanoate<br>106-32-1 | Ethyl dodecanoate<br>106-33-2 | Ethyl tetradecanoate<br>124-06-1 | Ethyl 9-hexadecenoate*    | Ethyl hexadecanoate<br>628-97-7 |
|--------|---------------|---------------------------|-----------------------------|----------------------------------|-----------------------------|-------------------------------|----------------------------------|---------------------------|---------------------------------|
| 615    | None          | 0.0746 <sup>a</sup>       | 0.1821 <sup>a</sup>         | 0 <sup>a</sup>                   | 0 <sup>a</sup>              | 0.0322 <sup>a</sup>           | 0 <sup>a</sup>                   | 0 <sup>a</sup>            | 0.0080 <sup>a</sup>             |
| 2058   | None          | 0.0117 <sup>a</sup>       | 0.0952 <sup>a</sup>         | 0.0015 <sup>a</sup>              | 0 <sup>a</sup>              | 0.0358 <sup>a</sup>           | 0.0017 <sup>a</sup>              | 0.0031 <sup>a</sup>       | 0.0022 <sup>a</sup>             |
| 2077   | None          | 0.0590 <sup>a</sup>       | 0.2218 <sup>a</sup>         | 0 <sup>a</sup>                   | 0 <sup>a</sup>              | 0.0577 <sup>a</sup>           | 0 <sup>a</sup>                   | 0.0036 <sup>a</sup>       | 0.0027 <sup>a</sup>             |
| 2082   | None          | 0.0210 <sup>a</sup>       | 0.1919 <sup>a</sup>         | 0 <sup>a</sup>                   | 0 <sup>a</sup>              | 0.2067 <sup>a</sup>           | 0.0201 <sup>a</sup>              | 0.0165 <sup>a</sup>       | 0.0217 <sup>a</sup>             |
| 2091   | None          | 0.0069 <sup>a</sup>       | 0.0857 <sup>a</sup>         | 0 <sup>a</sup>                   | 0 <sup>a</sup>              | 0.0316 <sup>a</sup>           | 0 <sup>a</sup>                   | 0.0030 <sup>a</sup>       | 0.0039 <sup>a</sup>             |
| 615    | Caffeic acid  | 0.0485 <sup>a</sup>       | 0.3424 <sup>a</sup>         | 0 <sup>a</sup>                   | 0 <sup>a</sup>              | <b>0.1420<sup>b</sup></b>     | <b>0.0071<sup>b</sup></b>        | <b>0.0144<sup>b</sup></b> | 0.0204 <sup>a</sup>             |
| 2058   | Caffeic acid  | 0.0263 <sup>a</sup>       | 0.2015 <sup>a</sup>         | 0.0021 <sup>a</sup>              | 0 <sup>a</sup>              | <b>0.0908<sup>b</sup></b>     | <b>0.0046<sup>b</sup></b>        | 0.0068 <sup>a</sup>       | 0.0057 <sup>a</sup>             |
| 2077   | Caffeic acid  | 0.0638 <sup>a</sup>       | 0.1967 <sup>a</sup>         | 0 <sup>a</sup>                   | 0 <sup>a</sup>              | 0.0955 <sup>a</sup>           | <b>0.0043<sup>b</sup></b>        | <b>0.0086<sup>b</sup></b> | 0.0053 <sup>a</sup>             |
| 2082   | Caffeic acid  | 0.0208 <sup>a</sup>       | 0.2242 <sup>a</sup>         | 0 <sup>a</sup>                   | <b>0.0019<sup>b</sup></b>   | 0.2637 <sup>a</sup>           | 0.0216 <sup>a</sup>              | 0.0195 <sup>a</sup>       | 0.0027 <sup>a</sup>             |
| 2091   | Caffeic acid  | 0.0122 <sup>a</sup>       | 0.1397 <sup>a</sup>         | 0 <sup>a</sup>                   | 0 <sup>a</sup>              | 0.0584 <sup>a</sup>           | <b>0.0018<sup>b</sup></b>        | 0.0051 <sup>a</sup>       | 0.0081 <sup>a</sup>             |
| 615    | Coumaric acid | 0.0556 <sup>a</sup>       | 0.3397 <sup>a</sup>         | 0 <sup>a</sup>                   | 0 <sup>a</sup>              | <b>0.1679<sup>b</sup></b>     | <b>0.0109<sup>b</sup></b>        | <b>0.0183<sup>b</sup></b> | <b>0.0260<sup>b</sup></b>       |
| 2058   | Coumaric acid | <b>0.0400<sup>b</sup></b> | <b>0.2432<sup>b</sup></b>   | 0.0023 <sup>a</sup>              | 0 <sup>a</sup>              | <b>0.1533<sup>b</sup></b>     | <b>0.0069<sup>b</sup></b>        | <b>0.0083<sup>b</sup></b> | <b>0.0109<sup>b</sup></b>       |
| 2077   | Coumaric acid | <b>0.1422<sup>b</sup></b> | 0.3006 <sup>a</sup>         | 0 <sup>a</sup>                   | 0 <sup>a</sup>              | <b>0.2103<sup>b</sup></b>     | <b>0.0071<sup>b</sup></b>        | <b>0.0110<sup>b</sup></b> | <b>0.0067<sup>b</sup></b>       |
| 2082   | Coumaric acid | <b>0.0582<sup>b</sup></b> | <b>0.4094<sup>b</sup></b>   | 0 <sup>a</sup>                   | 0 <sup>a</sup>              | <b>0.5247<sup>b</sup></b>     | 0.0396 <sup>a</sup>              | <b>0.0047<sup>b</sup></b> | 0.0429 <sup>a</sup>             |
| 2091   | Coumaric acid | <b>0.0615<sup>b</sup></b> | <b>0.237<sup>b</sup></b>    | 0 <sup>a</sup>                   | 0 <sup>a</sup>              | <b>0.1834<sup>b</sup></b>     | <b>0.0042<sup>b</sup></b>        | 0.0078 <sup>a</sup>       | <b>0.0102<sup>b</sup></b>       |
| 615    | Ferulic acid  | 0.0438 <sup>a</sup>       | 0.2886 <sup>a</sup>         | 0 <sup>a</sup>                   | 0 <sup>a</sup>              | <b>0.0894<sup>b</sup></b>     | <b>0.0023<sup>b</sup></b>        | <b>0.0025<sup>b</sup></b> | <b>0.0470<sup>b</sup></b>       |
| 2058   | Ferulic acid  | 0.0157 <sup>a</sup>       | 0.1531 <sup>a</sup>         | 0.002 <sup>a</sup>               | 0 <sup>a</sup>              | 0.0647 <sup>a</sup>           | 0.0021 <sup>a</sup>              | 0.0023 <sup>a</sup>       | 0.0043 <sup>a</sup>             |
| 2077   | Ferulic acid  | 0.0381 <sup>a</sup>       | 0.2247 <sup>a</sup>         | 0 <sup>a</sup>                   | 0 <sup>a</sup>              | 0.0895 <sup>a</sup>           | <b>0.0052<sup>b</sup></b>        | 0.0052 <sup>a</sup>       | <b>0.0085<sup>b</sup></b>       |
| 2082   | Ferulic acid  | 0.0119 <sup>a</sup>       | 0.1833 <sup>a</sup>         | 0 <sup>a</sup>                   | <b>0.0013<sup>b</sup></b>   | 0.1838 <sup>a</sup>           | 0.0204 <sup>a</sup>              | 0.0175 <sup>a</sup>       | 0.0390 <sup>a</sup>             |
| 2091   | Ferulic acid  | <b>0<sup>b</sup></b>      | 0.0900 <sup>a</sup>         | 0 <sup>a</sup>                   | 0 <sup>a</sup>              | 0.0282 <sup>a</sup>           | 0 <sup>a</sup>                   | 0 <sup>a</sup>            | 0.0034 <sup>a</sup>             |
| 615    | Phenylalanine | <b>0.0140<sup>b</sup></b> | 0.2404 <sup>a</sup>         | <b>0.0017<sup>b</sup></b>        | 0 <sup>a</sup>              | <b>0.0929<sup>b</sup></b>     | <b>0.0035<sup>b</sup></b>        | <b>0.0008<sup>b</sup></b> | 0.0046 <sup>a</sup>             |
| 2058   | Phenylalanine | <b>0<sup>b</sup></b>      | 0.1016 <sup>a</sup>         | 0.0021 <sup>a</sup>              | 0 <sup>a</sup>              | 0.0556 <sup>a</sup>           | <b>0<sup>b</sup></b>             | <b>0<sup>b</sup></b>      | 0.0028 <sup>a</sup>             |
| 2077   | Phenylalanine | 0.0530 <sup>a</sup>       | 0.1978 <sup>a</sup>         | 0 <sup>a</sup>                   | 0 <sup>a</sup>              | 0.0966 <sup>a</sup>           | <b>0.0042<sup>b</sup></b>        | <b>0.0108<sup>b</sup></b> | <b>0.0085<sup>b</sup></b>       |
| 2082   | Phenylalanine | 0.0188 <sup>a</sup>       | 0.2349 <sup>a</sup>         | 0 <sup>a</sup>                   | <b>0.0013<sup>b</sup></b>   | 0.1270 <sup>a</sup>           | <b>0.0042<sup>b</sup></b>        | <b>0.0016<sup>b</sup></b> | 0.0245 <sup>a</sup>             |
| 2091   | Phenylalanine | <b>0<sup>b</sup></b>      | 0.0907 <sup>a</sup>         | 0 <sup>a</sup>                   | 0 <sup>a</sup>              | <b>0.0142<sup>b</sup></b>     | 0 <sup>a</sup>                   | <b>0<sup>b</sup></b>      | <b>0<sup>b</sup></b>            |
| 615    | Tryptophan    | <b>0.0281<sup>b</sup></b> | 0.2428 <sup>a</sup>         | 0 <sup>a</sup>                   | 0 <sup>a</sup>              | <b>0.0712<sup>b</sup></b>     | <b>0.0032<sup>b</sup></b>        | <b>0.0011<sup>b</sup></b> | 0.0073 <sup>a</sup>             |
| 2058   | Tryptophan    | <b>0<sup>b</sup></b>      | 0.1221 <sup>a</sup>         | 0.0021 <sup>a</sup>              | 0 <sup>a</sup>              | 0.0475 <sup>a</sup>           | <b>0<sup>b</sup></b>             | 0.0014 <sup>a</sup>       | 0.0033 <sup>a</sup>             |
| 2077   | Tryptophan    | <b>0.0188<sup>b</sup></b> | 0.2076 <sup>a</sup>         | 0 <sup>a</sup>                   | 0 <sup>a</sup>              | 0.0764 <sup>a</sup>           | <b>0.0051<sup>b</sup></b>        | <b>0.0119<sup>b</sup></b> | <b>0.0102<sup>b</sup></b>       |
| 2082   | Tryptophan    | 0.0113 <sup>a</sup>       | 0.1794 <sup>a</sup>         | 0 <sup>a</sup>                   | 0 <sup>a</sup>              | 0.1914 <sup>a</sup>           | 0.0225 <sup>a</sup>              | 0.0266 <sup>a</sup>       | 0.0357 <sup>a</sup>             |
| 2091   | Tryptophan    | <b>0<sup>b</sup></b>      | 0.0836 <sup>a</sup>         | 0 <sup>a</sup>                   | 0 <sup>a</sup>              | 0.0191 <sup>a</sup>           | 0 <sup>a</sup>                   | 0.0014 <sup>a</sup>       | 0.0043 <sup>a</sup>             |
| 615    | Tyrosine      | <b>0.0133<sup>b</sup></b> | 0.2530 <sup>a</sup>         | 0 <sup>a</sup>                   | 0 <sup>a</sup>              | <b>0.0772<sup>b</sup></b>     | <b>0.0038<sup>b</sup></b>        | <b>0.0066<sup>b</sup></b> | <b>0.0206<sup>b</sup></b>       |
| 2058   | Tyrosine      | <b>0.0210<sup>b</sup></b> | <b>0.2461<sup>b</sup></b>   | 0.0034 <sup>a</sup>              | 0 <sup>a</sup>              | <b>0.1080<sup>b</sup></b>     | <b>0<sup>b</sup></b>             | 0.0015 <sup>a</sup>       | <b>0.0083<sup>b</sup></b>       |
| 2077   | Tyrosine      | 0.0531 <sup>a</sup>       | 0.1578 <sup>a</sup>         | 0 <sup>a</sup>                   | 0 <sup>a</sup>              | <b>0.0036<sup>b</sup></b>     | 0 <sup>a</sup>                   | 0.0028 <sup>a</sup>       | 0.0030 <sup>a</sup>             |
| 2082   | Tyrosine      | <b>0.0666<sup>b</sup></b> | 0.3369 <sup>a</sup>         | 0 <sup>a</sup>                   | <b>0.0028<sup>b</sup></b>   | 0.1712 <sup>a</sup>           | <b>0.0058<sup>b</sup></b>        | <b>0.0039<sup>b</sup></b> | <b>0<sup>b</sup></b>            |
| 2091   | Tyrosine      | <b>0<sup>b</sup></b>      | 0.1583 <sup>a</sup>         | 0 <sup>a</sup>                   | 0 <sup>a</sup>              | 0.0302 <sup>a</sup>           | 0 <sup>a</sup>                   | <b>0<sup>b</sup></b>      | <b>0<sup>b</sup></b>            |

\*CAS number and standard not available.
